# Supplementary material for: Reactive spark plasma-assisted synthesis of metastable rare-earth ferrites with widely tunable charge ordering transfer properties
Source: Royal Society of Chemistry journal article supplement (doi:10.1039/d2cp02592b), 2022-01-01
Supplement: d2cp02592b1.pdf [file d2cp02592b1.pdf]

## **Reactive spark plasma assisted synthesis of metastable rare-earth ferrites with widely tunable charge ordering transfer properties**

Yuchen Cui,<sup>a</sup> Ziang Li,<sup>a</sup> Haiyan Li,<sup>a</sup> Yi Bian,<sup>a</sup> Hao Zhang,<sup>b</sup> Fang Zhang,<sup>b</sup> Jiaou Wang,<sup>c</sup> Yong Jiang,<sup>a</sup> Nuofu Chen<sup>b</sup> and Jikun Chen<sup>a\*</sup>

<sup>a</sup> Beijing Advanced Innovation Center for Materials Genome Engineering, School of Materials Science and Engineering, University of Science and Technology Beijing, Beijing 100083, China

<sup>b</sup> School of Renewable Energy, North China Electric Power University, Beijing 102206, China

<sup>c</sup> Beijing Synchrotron Radiation Facility, Institute of High Energy Physics, Chinese Academy of Sciences, Beijing 100049, China

Correspondence: Prof. Jikun Chen ([jikunchen@ustb.edu.cn](mailto:jikunchen@ustb.edu.cn))

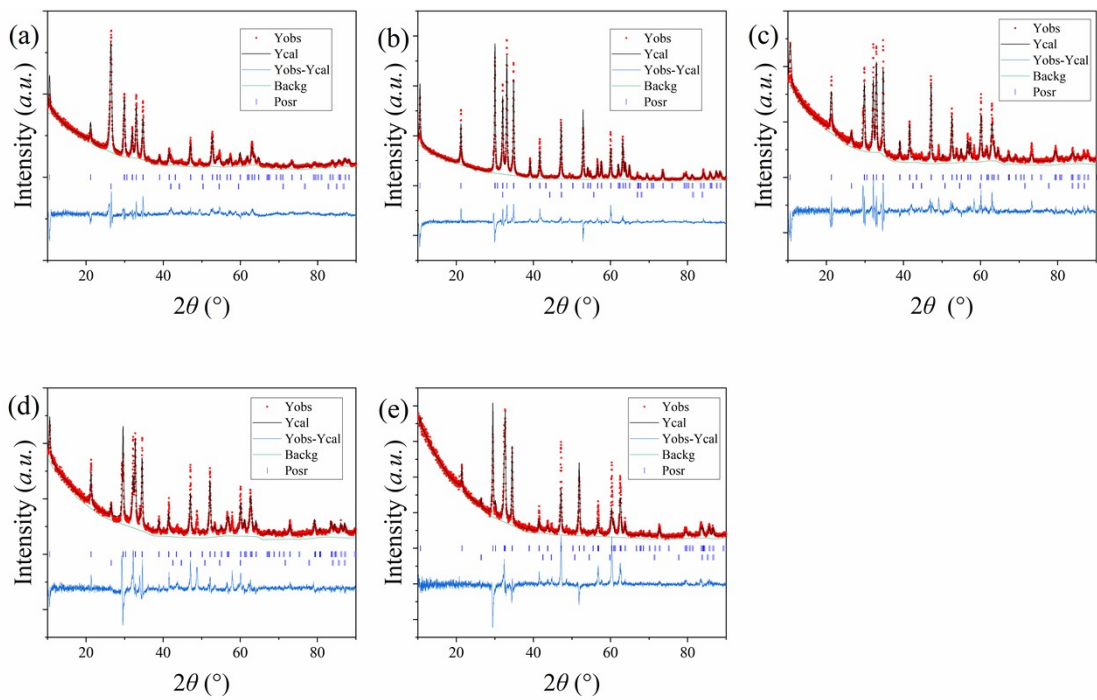

**Fig. S1.** (a-e) X-ray diffraction (XRD) and refinement of  $ReFe_2O_4$  bulk; (a)  $LuFe_2O_4$ ; (b)  $YbFe_2O_4$ ; (c)  $TmFe_2O_4$ ; (d)  $ErFe_2O_4$ ; (e)  $YFe_2O_4$ .

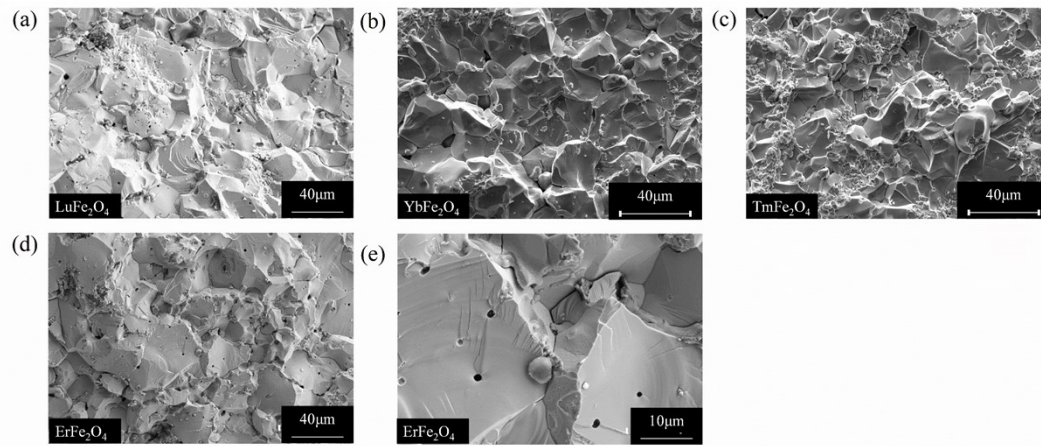

**Fig. S2.** Scanning electron microscope (SEM) images on cross section of  $ReFe_2O_4$  bulk; (a) LuFe<sub>2</sub>O<sub>4</sub>; (b) YbFe<sub>2</sub>O<sub>4</sub>; (c) TmFe<sub>2</sub>O<sub>4</sub>; (d-e) ErFe<sub>2</sub>O<sub>4</sub>.

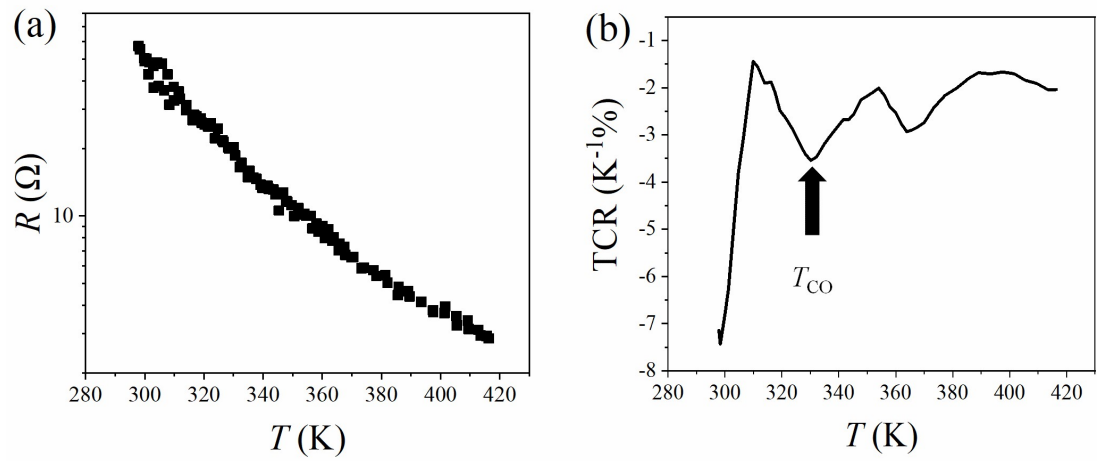

**Fig. S3.** Electric transport property of LuFe<sub>2</sub>O<sub>4</sub>. (a) Resistance as a function of temperature ( $R$ - $T$ ); (b) Temperature coefficient of resistance (TCR) of LuFe<sub>2</sub>O<sub>4</sub> calculated from figure S3(a).

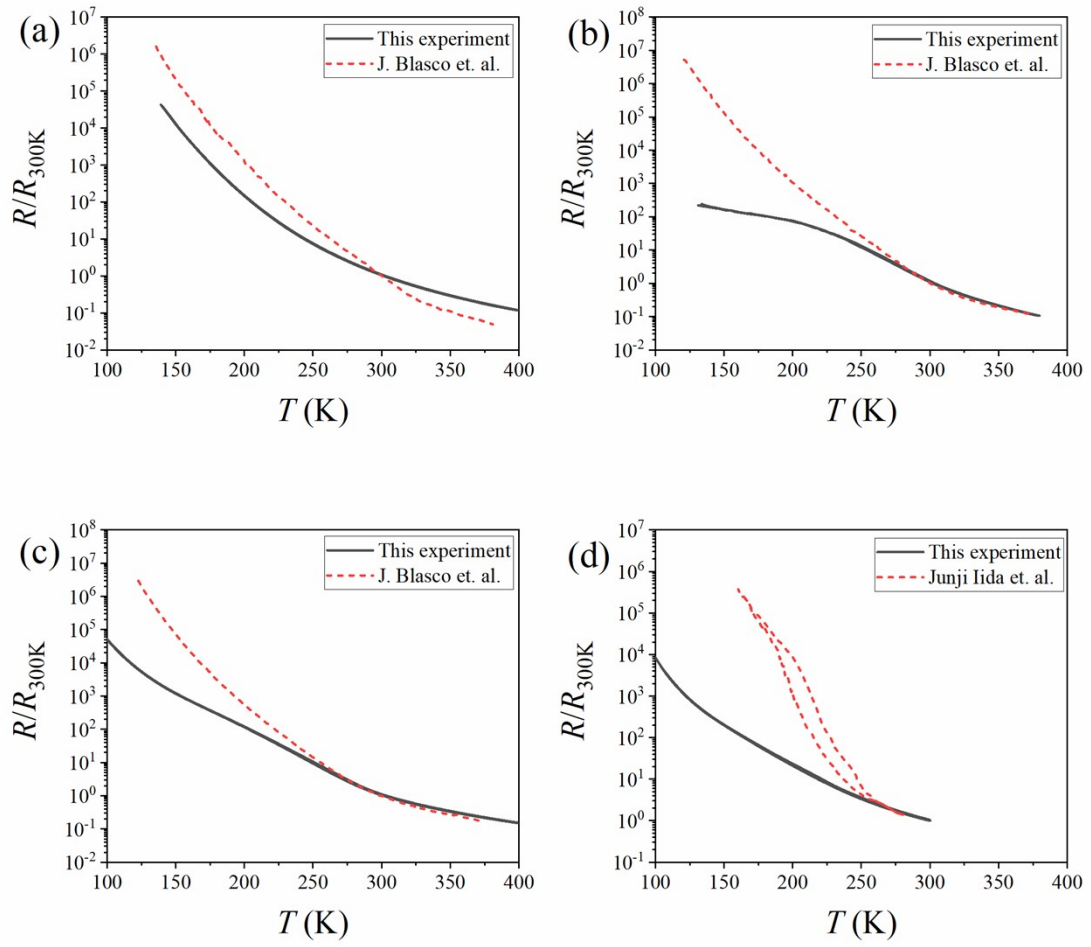

**Fig. S4.** Comparison on electric transport properties of  $ReFe_2O_4$  in this paper and reference <sup>1, 2</sup>. (a)  $LuFe_2O_4$ ; (b)  $YbFe_2O_4$ ; (c)  $TmFe_2O_4$ ; (d)  $ErFe_2O_4$ .

**Tab. S1.** Multi-phase refinement of  $ReFe_2O_4$  powder, the phase content is in mass fraction percentage

|             | $ReFe_2O_4$ | $ReFeO_3$ | $Re_2O_3$ |
|-------------|-------------|-----------|-----------|
| $LuFe_2O_4$ | 96          | 4         | 0         |
| $YbFe_2O_4$ | 100         | 0         | 0         |
| $TmFe_2O_4$ | 89          | 11        | 0         |
| $ErFe_2O_4$ | 83          | 14        | 0         |
| $YFe_2O_4$  | 54          | 0         | 46        |

**Tab. S2.** Crystallite sizes and strain of  $ReFe_2O_4$ 

|             | FWHM/ $^\circ$ | $D_{006}/nm$ | strain    |
|-------------|----------------|--------------|-----------|
| $LuFe_2O_4$ | 0.15797        | 53           | 1.81E-03  |
| $YbFe_2O_4$ | 0.15976        | 52           | -9.00E-04 |
| $TmFe_2O_4$ | 0.13671        | 61           | -8.96E-04 |
| $ErFe_2O_4$ | 0.12541        | 67           | 8.95E-04  |

### Supplementary Reference

1. J. Blasco, S. Lafuerza, J. García and G. Subías, *Phys. Rev. B*, 2014, **90**, 094119.
2. Junji Iida, Midori Tanaka, Hijiri Kito and J. Akimitsu, *J. Phys. Soc. Jpn.*, 1990, **9**, 4190-4191.
